# Supplementary material for: Rapid and selective deallylation of allyl ethers and esters using iodine in polyethylene glycol-400
Source: Royal Society of Chemistry journal article supplement (doi:10.1039/c1gc15153c), 2011-01-01
Supplement: c1gc15153c.pdf [file c1gc15153c.pdf]

**Characterization data of deallylated compounds**

**4-*[(N-allyl-4-chlorophenyl amino) methyl] phenol (2c)***: IR (KBr): 3228, 3051: <sup>1</sup>H NMR (300 MHz, CDCl<sub>3</sub>): δ 4.68 (m, 2H), δ 5.11 (s, 1H, OH), δ 5.23 (m, 1H), δ 5.35 (s, 2H, CH<sub>2</sub>), δ 6.02 (m, 1H), δ 6.18 (m, 1H), δ 6.68-7.21 (m, 8H, Ar-H); MS(*m/z*): 273 (M<sup>+</sup> ion), 275 (M+2); Anal. Calcd for C<sub>16</sub>H<sub>16</sub>NOCl: C, 70.21; H, 5.89; N, 5.12%. Found: C, 70.28; H, 5.81; N, 5.19%

**2-*[(N-allyl-4-methylphenyl amino) methyl] phenol (2d)***: IR (KBr): 3198, 3051: <sup>1</sup>H NMR (300 MHz, CDCl<sub>3</sub>): δ 2.21 (s, 3H, CH<sub>3</sub>), δ 4.61 (m, 2H), δ 5.18 (m, 1H), δ 5.30 (s, 2H, CH<sub>2</sub>), δ 5.92 (m, 1H), δ 6.13 (m, 1H), δ 6.56-7.21 (m, 8H, Ar-H), δ 10.11 (s, 1H, OH); MS(*m/z*): 253 (M<sup>+</sup> ion); Anal. Calcd for C<sub>17</sub>H<sub>19</sub>NO: C, 80.61; H, 7.56; N, 5.53%. Found: C, 80.52; H, 7.62; N, 5.45%

**2-*[(N-allyl-4-methylphenyl amino) methyl] phenol (2e)***: IR (KBr): 3205, 3062: <sup>1</sup>H NMR (300 MHz, CDCl<sub>3</sub>): δ 2.25 (s, 3H, CH<sub>3</sub>), δ 4.65 (m, 2H), δ 5.02 (s, 1H, OH), δ 5.22 (m, 1H), δ 5.34 (s, 2H, CH<sub>2</sub>), δ 5.98 (m, 1H), δ 6.15 (m, 1H), δ 6.78-7.15 (m, 8H, Ar-H); <sup>13</sup>C CMR (300 MHz, CDCl<sub>3</sub>): 22, 50, 58, 112 (2 X C), 115 (2 X C), 117, 129 (2 X C), 130 (2 X C), 131, 132 (2 X C), 135, 146, 156; MS(*m/z*): 253 (M<sup>+</sup> ion); Anal. Calcd for C<sub>17</sub>H<sub>19</sub>NO: C, 80.61; H, 7.56; N, 5.53%. Found: C, 80.65; H, 7.62; N, 5.58%

**2-*[(N-allyl-4-methoxyphenyl amino) methyl] phenol (2f)***: IR (KBr): 3216, 3052: <sup>1</sup>H NMR (300 MHz, CDCl<sub>3</sub>): δ 3.38 (s, 3H, OCH<sub>3</sub>), δ 4.75 (m, 2H), δ 5.21 (m, 1H), δ 5.36 (s, 2H, CH<sub>2</sub>), δ 5.88 (m, 1H), δ 6.11 (m, 1H), δ 6.86-7.21 (m, 8H, Ar-H), δ 10.91 (s, 1H, OH); MS(*m/z*): 269 (M<sup>+</sup> ion); Anal. Calcd for C<sub>17</sub>H<sub>19</sub>NO<sub>2</sub>: C, 75.81; H, 7.11; N, 5.19%. Found: C, 75.89; H, 7.18; N, 5.11%

**4-*[(N-allyl-4-methoxyphenyl amino) methyl] phenol (2g)***: IR (KBr): 3224, 3068: <sup>1</sup>H NMR (300 MHz, CDCl<sub>3</sub>): δ 3.46 (s, 3H, OCH<sub>3</sub>), δ 4.71 (m, 2H), δ 4.98 (s, 1H, OH), δ 5.24 (m, 1H), δ 5.32 (s, 2H, CH<sub>2</sub>), δ 5.86 (m, 1H), δ 6.05 (m, 1H), δ 6.58-7.25 (m, 8H, Ar-H); MS(*m/z*): 269 (M<sup>+</sup> ion); Anal. Calcd for C<sub>17</sub>H<sub>19</sub>NO<sub>2</sub>: C, 75.81; H, 7.11; N, 5.20%. Found: C, 75.92; H, 7.16; N, 5.26%

**3-(N-allyl-N-(3-chlorophenyl)amino)-1,3-diphenyl propan-1-ol (4c):** IR (KBr): 3216; 3065: <sup>1</sup>H NMR (300 MHz, CDCl<sub>3</sub>): δ 3.36 (m, 1H), δ 4.18 (m, 1H), δ 4.28 (s, 1H, OH), δ 4.51 (m, 2H), δ 5.13 (m, 1H), δ 5.32 (s, 2H, CH<sub>2</sub>), δ 6.05 (m, 1H), δ 6.48 (m, 1H), δ 6.71-7.38 (m, 14H, Ar-H); MS(*m/z*): 377 (M<sup>+</sup> ion), 379 (M+2); Anal. Calcd for C<sub>24</sub>H<sub>24</sub>NOCl: C, 76.28; H, 6.41; N, 3.72%. Found: C, 76.21; H, 6.48; N, 3.78%

**2-(N-allylbenzamido)acetic acid (5b):** IR (KBr): 3452; 1722: <sup>1</sup>H NMR (300 MHz, CDCl<sub>3</sub>): δ 4.65 (m, 2H), δ 4.98 (s, 2H), δ 5.28 (m, 1H), δ 5.35 (m, 1H), δ 5.98 (m, 1H), δ 6.98-7.28 (m, 5H, Ar-H), 13.36 (bs, 1H, -COOH); MS(*m/z*): 219 (M<sup>+</sup> ion); Anal. Calcd for C<sub>12</sub>H<sub>13</sub>NO<sub>3</sub>: C, 65.74; H, 5.98; N, 6.39%. Found: C, 65.83; H, 5.91; N, 6.44%

**3-(Diallylamino) propanoic acid (5d):** IR (KBr): 3460; 1722: <sup>1</sup>H NMR (300 MHz, CDCl<sub>3</sub>): δ 2.62 (t, 2H), δ 3.65 (t, 2H), δ 4.65 (m, 4H), δ 5.26 (m, 2H), δ 5.34 (m, 2H), δ 6.11 (m, 2H), 13.14 (bs, 1H, -COOH); <sup>13</sup>C NMR (300 MHz, CDCl<sub>3</sub>): 36, 53, 58 (2 X C), 117 (2 X C), 134 (2 X C), 171; MS(*m/z*): 169 (M<sup>+</sup> ion); Anal. Calcd for C<sub>9</sub>H<sub>15</sub>NO<sub>2</sub>: C, 63.58; H, 8.93; N, 8.28%. Found: C, 63.64; H, 8.91; N, 8.35%
